# Supplementary material for: Time-Course Transcriptome Analysis for Drug Repositioning in Fusobacterium nucleatum-Infected Human Gingival Fibroblasts
Source: Front Cell Dev Biol. 2019 Sep 20;7:204. doi: 10.3389/fcell.2019.00204 (PMC6771468; doi:10.3389/fcell.2019.00204)
Supplement: TABLE S3 — Twenty-two core DEGs of time-series F. nucleantum-infected GFs. [file Table_3.XLSX]

## Sheet: intersect_time_indep_gene_KEGG_
SYMBOL	GENENAME	PATH	path_name	GO	Term	Ontology	Definition
BIRC3	baculoviral IAP repeat containing 3	04120; 04210; 04510; 04621; 05145; 05200; 05222	Ubiquitin mediated proteolysis; Apoptosis; Focal adhesion; NOD-like receptor signaling pathway; Toxoplasmosis; Pathways in cancer; Small cell lung cancer	GO:0000910; GO:0002756; GO:0004842; GO:0005515; GO:0005634; GO:0005654; GO:0005737; GO:0005829; GO:0006915; GO:0007166; GO:0007249; GO:0007283; GO:0009966; GO:0010803; GO:0016567; GO:0016579; GO:0016740; GO:0031398; GO:0033209; GO:0034121; GO:0035666; GO:0038061; GO:0039535; GO:0042981; GO:0043027; GO:0043066; GO:0043123; GO:0045088; GO:0045121; GO:0046872; GO:0050727; GO:0051291; GO:0060544; GO:…	cytokinesis; MyD88-independent toll-like receptor signaling pathway; ubiquitin-protein transferase activity; protein binding; nucleus; nucleoplasm; cytoplasm; cytosol; apoptotic process; cell surface receptor signaling pathway; I-kappaB kinase/NF-kappaB signaling; spermatogenesis; regulation of signal transduction; regulation of tumor necrosis factor-mediated signaling pathway; protein ubiquitina…	BP; MF; CC	The division of the cytoplasm and the plasma membrane of a cell and its partitioning into two daughter cells.; Any series of molecular signals generated as a consequence of binding to a toll-like receptor not relying on the MyD88 adaptor molecule. Toll-like receptors directly bind pattern motifs from a variety of microbial sources to initiate innate immune response.; Catalysis of the transfer of …
C11orf96	chromosome 11 open reading frame 96
CCL2	C-C motif chemokine ligand 2	04060; 04062; 04621; 05142; 05144; 05323	Cytokine-cytokine receptor interaction; Chemokine signaling pathway; NOD-like receptor signaling pathway; Chagas disease (American trypanosomiasis); Malaria; Rheumatoid arthritis	GO:0000165; GO:0001525; GO:0002548; GO:0004672; GO:0005102; GO:0005515; GO:0005576; GO:0005615; GO:0005622; GO:0006468; GO:0006935; GO:0006954; GO:0006959; GO:0007010; GO:0007155; GO:0007165; GO:0007166; GO:0007186; GO:0007187; GO:0007259; GO:0008009; GO:0008360; GO:0009617; GO:0009887; GO:0010469; GO:0019079; GO:0019221; GO:0019725; GO:0030593; GO:0031663; GO:0031727; GO:0034351; GO:0035684; GO:…	MAPK cascade; angiogenesis; monocyte chemotaxis; protein kinase activity; signaling receptor binding; protein binding; extracellular region; extracellular space; intracellular; protein phosphorylation; chemotaxis; inflammatory response; humoral immune response; cytoskeleton organization; cell adhesion; signal transduction; cell surface receptor signaling pathway; G-protein coupled receptor signal…	BP; MF; CC	An intracellular protein kinase cascade containing at least a MAPK, a MAPKK and a MAP3K. The cascade can also contain an additional tiers: the upstream MAP4K. The kinases in each tier phosphorylate and activate the kinase in the downstream tier to transmit a signal within a cell.; Blood vessel formation when new vessels emerge from the proliferation of pre-existing blood vessels.; The movement of…
CLDN1	claudin 1	04514; 04530; 04670; 05130; 05160	Cell adhesion molecules (CAMs); Tight junction; Leukocyte transendothelial migration; Pathogenic Escherichia coli infection; Hepatitis C	GO:0001618; GO:0005198; GO:0005515; GO:0005737; GO:0005887; GO:0005923; GO:0007568; GO:0008065; GO:0016021; GO:0016323; GO:0016324; GO:0016328; GO:0016338; GO:0032496; GO:0042538; GO:0042802; GO:0045216; GO:0045471; GO:0046718; GO:0051260; GO:0051291; GO:0061436; GO:0061772; GO:0070673; GO:0070830; GO:0071284; GO:0071346; GO:0071356; GO:0071548; GO:0071560; GO:0090557; GO:0097421; GO:1903348; GO:…	virus receptor activity; structural molecule activity; protein binding; cytoplasm; integral component of plasma membrane; bicellular tight junction; aging; establishment of blood-nerve barrier; integral component of membrane; basolateral plasma membrane; apical plasma membrane; lateral plasma membrane; calcium-independent cell-cell adhesion via plasma membrane cell-adhesion molecules; response to…	MF; CC; BP	Combining with a virus component and mediating entry of the virus into the cell.; The action of a molecule that contributes to the structural integrity of a complex or its assembly within or outside a cell.; Interacting selectively and non-covalently with any protein or protein complex (a complex of two or more proteins that may include other nonprotein molecules).; All of the contents of a cell …
CSF2	colony stimulating factor 2	04060; 04630; 04640; 04650; 04660; 04664; 05146; 05323	Cytokine-cytokine receptor interaction; Jak-STAT signaling pathway; Hematopoietic cell lineage; Natural killer cell mediated cytotoxicity; T cell receptor signaling pathway; Fc epsilon RI signaling pathway; Amoebiasis; Rheumatoid arthritis	GO:0000165; GO:0001821; GO:0001892; GO:0002521; GO:0004713; GO:0005088; GO:0005125; GO:0005129; GO:0005515; GO:0005576; GO:0005615; GO:0006955; GO:0008083; GO:0008284; GO:0010469; GO:0010628; GO:0010744; GO:0018108; GO:0019221; GO:0030223; GO:0030224; GO:0032747; GO:0034021; GO:0034405; GO:0042045; GO:0042116; GO:0042531; GO:0043011; GO:0043231; GO:0045187; GO:0045637; GO:0045740; GO:0045892; GO:…	MAPK cascade; histamine secretion; embryonic placenta development; leukocyte differentiation; protein tyrosine kinase activity; Ras guanyl-nucleotide exchange factor activity; cytokine activity; granulocyte macrophage colony-stimulating factor receptor binding; protein binding; extracellular region; extracellular space; immune response; growth factor activity; positive regulation of cell prolifer…	BP; MF; CC	An intracellular protein kinase cascade containing at least a MAPK, a MAPKK and a MAP3K. The cascade can also contain an additional tiers: the upstream MAP4K. The kinases in each tier phosphorylate and activate the kinase in the downstream tier to transmit a signal within a cell.; The regulated release of histamine by a cell or tissue. It is formed by decarboxylation of histidine and it acts thro…
CXCL1	C-X-C motif chemokine ligand 1	04060; 04062; 04621; 05120; 05146; 05323	Cytokine-cytokine receptor interaction; Chemokine signaling pathway; NOD-like receptor signaling pathway; Epithelial cell signaling in Helicobacter pylori infection; Amoebiasis; Rheumatoid arthritis	GO:0002690; GO:0005102; GO:0005576; GO:0005615; GO:0006935; GO:0006954; GO:0006955; GO:0007165; GO:0007186; GO:0007399; GO:0008009; GO:0008047; GO:0008083; GO:0008283; GO:0008285; GO:0010469; GO:0019221; GO:0030036; GO:0032496; GO:0035556; GO:0035580; GO:0042127; GO:0043085; GO:0043312; GO:0045236; GO:0060326; GO:0070098; GO:0090023; GO:1904724	positive regulation of leukocyte chemotaxis; signaling receptor binding; extracellular region; extracellular space; chemotaxis; inflammatory response; immune response; signal transduction; G-protein coupled receptor signaling pathway; nervous system development; chemokine activity; enzyme activator activity; growth factor activity; cell proliferation; negative regulation of cell proliferation; re…	BP; MF; CC	Any process that activates or increases the frequency, rate, or extent of leukocyte chemotaxis.; Interacting selectively and non-covalently with one or more specific sites on a receptor molecule, a macromolecule that undergoes combination with a hormone, neurotransmitter, drug or intracellular messenger to initiate a change in cell function.; The space external to the outermost structure of a cel…
CXCL2	C-X-C motif chemokine ligand 2	04060; 04062; 04621	Cytokine-cytokine receptor interaction; Chemokine signaling pathway; NOD-like receptor signaling pathway	GO:0002237; GO:0002690; GO:0005515; GO:0005576; GO:0005615; GO:0006935; GO:0006954; GO:0006955; GO:0007186; GO:0008009; GO:0010469; GO:0019221; GO:0032496; GO:0042127; GO:0045236; GO:0060326; GO:0070098; GO:0090023	response to molecule of bacterial origin; positive regulation of leukocyte chemotaxis; protein binding; extracellular region; extracellular space; chemotaxis; inflammatory response; immune response; G-protein coupled receptor signaling pathway; chemokine activity; regulation of signaling receptor activity; cytokine-mediated signaling pathway; response to lipopolysaccharide; regulation of cell pro…	BP; MF; CC	Any process that results in a change in state or activity of an organism (in terms of movement, secretion, enzyme production, gene expression, etc.) as a result of a stimulus by molecules of bacterial origin such as peptides derived from bacterial flagellin.; Any process that activates or increases the frequency, rate, or extent of leukocyte chemotaxis.; Interacting selectively and non-covalently…
CXCL3	C-X-C motif chemokine ligand 3	04060; 04062	Cytokine-cytokine receptor interaction; Chemokine signaling pathway	GO:0002690; GO:0005576; GO:0005615; GO:0006954; GO:0006955; GO:0007186; GO:0008009; GO:0010469; GO:0030593; GO:0032496; GO:0042127; GO:0045236; GO:0070098; GO:0090023	positive regulation of leukocyte chemotaxis; extracellular region; extracellular space; inflammatory response; immune response; G-protein coupled receptor signaling pathway; chemokine activity; regulation of signaling receptor activity; neutrophil chemotaxis; response to lipopolysaccharide; regulation of cell proliferation; CXCR chemokine receptor binding; chemokine-mediated signaling pathway; po…	BP; CC; MF	Any process that activates or increases the frequency, rate, or extent of leukocyte chemotaxis.; The space external to the outermost structure of a cell. For cells without external protective or external encapsulating structures this refers to space outside of the plasma membrane. This term covers the host cell environment outside an intracellular parasite.; That part of a multicellular organism …
CXCL5	C-X-C motif chemokine ligand 5	04060; 04062; 05323	Cytokine-cytokine receptor interaction; Chemokine signaling pathway; Rheumatoid arthritis	GO:0002446; GO:0002690; GO:0005576; GO:0005615; GO:0006935; GO:0006954; GO:0006955; GO:0007165; GO:0007186; GO:0007267; GO:0008009; GO:0008284; GO:0010469; GO:0032496; GO:0042127; GO:0042802; GO:0045236; GO:0060326; GO:0070098; GO:0090023	neutrophil mediated immunity; positive regulation of leukocyte chemotaxis; extracellular region; extracellular space; chemotaxis; inflammatory response; immune response; signal transduction; G-protein coupled receptor signaling pathway; cell-cell signaling; chemokine activity; positive regulation of cell proliferation; regulation of signaling receptor activity; response to lipopolysaccharide; reg…	BP; CC; MF	Any process involved in the carrying out of an immune response by a neutrophil.; Any process that activates or increases the frequency, rate, or extent of leukocyte chemotaxis.; The space external to the outermost structure of a cell. For cells without external protective or external encapsulating structures this refers to space outside of the plasma membrane. This term covers the host cell envir…
CXCL8	C-X-C motif chemokine ligand 8	04060; 04062; 04620; 04621; 04622; 05120; 05131; 05142; 05144; 05146; 05160; 05200; 05219; 05323	Cytokine-cytokine receptor interaction; Chemokine signaling pathway; Toll-like receptor signaling pathway; NOD-like receptor signaling pathway; RIG-I-like receptor signaling pathway; Epithelial cell signaling in Helicobacter pylori infection; Shigellosis; Chagas disease (American trypanosomiasis); Malaria; Amoebiasis; Hepatitis C; Pathways in cancer; Bladder cancer; Rheumatoid arthritis	GO:0001525; GO:0002237; GO:0002690; GO:0005153; GO:0005515; GO:0005576; GO:0005615; GO:0005622; GO:0006935; GO:0006954; GO:0006955; GO:0007050; GO:0007165; GO:0007186; GO:0008009; GO:0008285; GO:0010469; GO:0019221; GO:0019722; GO:0030155; GO:0030593; GO:0031623; GO:0032496; GO:0034976; GO:0035556; GO:0036499; GO:0042119; GO:0042127; GO:0044344; GO:0045091; GO:0045236; GO:0045744; GO:0045766; GO:…	angiogenesis; response to molecule of bacterial origin; positive regulation of leukocyte chemotaxis; interleukin-8 receptor binding; protein binding; extracellular region; extracellular space; intracellular; chemotaxis; inflammatory response; immune response; cell cycle arrest; signal transduction; G-protein coupled receptor signaling pathway; chemokine activity; negative regulation of cell proli…	BP; MF; CC	Blood vessel formation when new vessels emerge from the proliferation of pre-existing blood vessels.; Any process that results in a change in state or activity of an organism (in terms of movement, secretion, enzyme production, gene expression, etc.) as a result of a stimulus by molecules of bacterial origin such as peptides derived from bacterial flagellin.; Any process that activates or increas…
EREG	epiregulin	4012	ErbB signaling pathway	GO:0000165; GO:0001525; GO:0001550; GO:0001556; GO:0001819; GO:0004713; GO:0005088; GO:0005154; GO:0005515; GO:0005576; GO:0005615; GO:0005622; GO:0005887; GO:0007143; GO:0007173; GO:0007267; GO:0008083; GO:0008284; GO:0008285; GO:0009299; GO:0009653; GO:0009887; GO:0018108; GO:0019221; GO:0030216; GO:0030728; GO:0038128; GO:0042060; GO:0042108; GO:0042327; GO:0042700; GO:0043434; GO:0043616; GO:…	MAPK cascade; angiogenesis; ovarian cumulus expansion; oocyte maturation; positive regulation of cytokine production; protein tyrosine kinase activity; Ras guanyl-nucleotide exchange factor activity; epidermal growth factor receptor binding; protein binding; extracellular region; extracellular space; intracellular; integral component of plasma membrane; female meiotic nuclear division; epidermal …	BP; MF; CC	An intracellular protein kinase cascade containing at least a MAPK, a MAPKK and a MAP3K. The cascade can also contain an additional tiers: the upstream MAP4K. The kinases in each tier phosphorylate and activate the kinase in the downstream tier to transmit a signal within a cell.; Blood vessel formation when new vessels emerge from the proliferation of pre-existing blood vessels.; Increase in siz…
G0S2	G0/G1 switch 2			GO:0003674; GO:0005515; GO:0005739; GO:0005811; GO:0019216; GO:0097191; GO:2001238	molecular_function; protein binding; mitochondrion; lipid droplet; regulation of lipid metabolic process; extrinsic apoptotic signaling pathway; positive regulation of extrinsic apoptotic signaling pathway	MF; CC; BP	The actions of a single gene product or complex at the molecular level consisting of a single biochemical activity or multiple causally linked biochemical activities. A given gene product may exhibit one or more molecular functions.; Interacting selectively and non-covalently with any protein or protein complex (a complex of two or more proteins that may include other nonprotein molecules).; A se…
ICAM1	intercellular adhesion molecule 1	04514; 04650; 04670; 05143; 05144; 05150; 05323; 05416	Cell adhesion molecules (CAMs); Natural killer cell mediated cytotoxicity; Leukocyte transendothelial migration; African trypanosomiasis; Malaria; Staphylococcus aureus infection; Rheumatoid arthritis; Viral myocarditis	GO:0001541; GO:0001618; GO:0001772; GO:0001910; GO:0001975; GO:0002291; GO:0002438; GO:0002457; GO:0002693; GO:0004888; GO:0005178; GO:0005515; GO:0005615; GO:0005886; GO:0005887; GO:0005925; GO:0007155; GO:0007157; GO:0007159; GO:0007569; GO:0007605; GO:0008360; GO:0009897; GO:0009986; GO:0010212; GO:0010477; GO:0016020; GO:0019221; GO:0022614; GO:0030198; GO:0030838; GO:0031012; GO:0031669; GO:…	ovarian follicle development; virus receptor activity; immunological synapse; regulation of leukocyte mediated cytotoxicity; response to amphetamine; T cell activation via T cell receptor contact with antigen bound to MHC molecule on antigen presenting cell; acute inflammatory response to antigenic stimulus; T cell antigen processing and presentation; positive regulation of cellular extravasation…	BP; MF; CC	The process whose specific outcome is the progression of the ovarian follicle over time, from its formation to the mature structure.; Combining with a virus component and mediating entry of the virus into the cell.; An area of close contact between a lymphocyte (T-, B-, or natural killer cell) and a target cell formed through the clustering of particular signaling and adhesion molecules and their…
IER3	immediate early response 3			GO:0005515; GO:0005634; GO:0005829; GO:0006915; GO:0009653; GO:0010941; GO:0014066; GO:0016021; GO:0043066; GO:2001020	protein binding; nucleus; cytosol; apoptotic process; anatomical structure morphogenesis; regulation of cell death; regulation of phosphatidylinositol 3-kinase signaling; integral component of membrane; negative regulation of apoptotic process; regulation of response to DNA damage stimulus	MF; CC; BP	Interacting selectively and non-covalently with any protein or protein complex (a complex of two or more proteins that may include other nonprotein molecules).; A membrane-bounded organelle of eukaryotic cells in which chromosomes are housed and replicated. In most cells, the nucleus contains all of the cell's chromosomes except the organellar chromosomes, and is the site of RNA synthesis and pro…
IL32	interleukin 32			GO:0005125; GO:0005515; GO:0005615; GO:0005829; GO:0006952; GO:0006955; GO:0007155; GO:0010469; GO:0016020; GO:0019221	cytokine activity; protein binding; extracellular space; cytosol; defense response; immune response; cell adhesion; regulation of signaling receptor activity; membrane; cytokine-mediated signaling pathway	MF; CC; BP	Functions to control the survival, growth, differentiation and effector function of tissues and cells.; Interacting selectively and non-covalently with any protein or protein complex (a complex of two or more proteins that may include other nonprotein molecules).; That part of a multicellular organism outside the cells proper, usually taken to be outside the plasma membranes, and occupied by flui…
IL6	interleukin 6	04060; 04620; 04621; 04623; 04630; 04640; 04672; 05020; 05142; 05143; 05144; 05146; 05200; 05323; 05332; 05410	Cytokine-cytokine receptor interaction; Toll-like receptor signaling pathway; NOD-like receptor signaling pathway; Cytosolic DNA-sensing pathway; Jak-STAT signaling pathway; Hematopoietic cell lineage; Intestinal immune network for IgA production; Prion diseases; Chagas disease (American trypanosomiasis); African trypanosomiasis; Malaria; Amoebiasis; Pathways in cancer; Rheumatoid arthritis; Graf…	GO:0001781; GO:0002384; GO:0002446; GO:0002548; GO:0002675; GO:0002690; GO:0005125; GO:0005138; GO:0005515; GO:0005576; GO:0005615; GO:0005788; GO:0005896; GO:0006953; GO:0006954; GO:0006959; GO:0008083; GO:0008284; GO:0008285; GO:0010469; GO:0010574; GO:0010628; GO:0010888; GO:0019221; GO:0030168; GO:0031018; GO:0031175; GO:0032494; GO:0032722; GO:0032755; GO:0032966; GO:0033138; GO:0042102; GO:…	neutrophil apoptotic process; hepatic immune response; neutrophil mediated immunity; monocyte chemotaxis; positive regulation of acute inflammatory response; positive regulation of leukocyte chemotaxis; cytokine activity; interleukin-6 receptor binding; protein binding; extracellular region; extracellular space; endoplasmic reticulum lumen; interleukin-6 receptor complex; acute-phase response; in…	BP; MF; CC	Any apoptotic process in a neutrophil, any of the immature or mature forms of a granular leukocyte that in its mature form has a nucleus with three to five lobes connected by slender threads of chromatin, and cytoplasm containing fine inconspicuous granules and stainable by neutral dyes.; An immune response taking place in the liver.; Any process involved in the carrying out of an immune response…
INHBA	inhibin beta A subunit	04060; 04350	Cytokine-cytokine receptor interaction; TGF-beta signaling pathway	GO:0000082; GO:0001541; GO:0001942; GO:0002244; GO:0005125; GO:0005160; GO:0005179; GO:0005515; GO:0005576; GO:0005615; GO:0006357; GO:0006952; GO:0007050; GO:0007166; GO:0007267; GO:0007399; GO:0008083; GO:0008285; GO:0008584; GO:0010469; GO:0010628; GO:0010862; GO:0017046; GO:0021773; GO:0030154; GO:0030218; GO:0030308; GO:0032270; GO:0032924; GO:0034711; GO:0035987; GO:0042326; GO:0042476; GO:…	G1/S transition of mitotic cell cycle; ovarian follicle development; hair follicle development; hematopoietic progenitor cell differentiation; cytokine activity; transforming growth factor beta receptor binding; hormone activity; protein binding; extracellular region; extracellular space; regulation of transcription by RNA polymerase II; defense response; cell cycle arrest; cell surface receptor …	BP; MF; CC	The mitotic cell cycle transition by which a cell in G1 commits to S phase. The process begins with the build up of G1 cyclin-dependent kinase (G1 CDK), resulting in the activation of transcription of G1 cyclins. The process ends with the positive feedback of the G1 cyclins on the G1 CDK which commits the cell to S phase, in which DNA replication is initiated.; The process whose specific outcome …
MMP12	matrix metallopeptidase 12			GO:0000122; GO:0001047; GO:0004175; GO:0004222; GO:0004252; GO:0005509; GO:0005518; GO:0005576; GO:0005578; GO:0005615; GO:0005634; GO:0005737; GO:0006508; GO:0006606; GO:0008270; GO:0022617; GO:0030574; GO:0035313; GO:0043565; GO:0045944; GO:0050691; GO:0060054; GO:0060339; GO:0060340; GO:0098586; GO:1902741	negative regulation of transcription by RNA polymerase II; core promoter binding; endopeptidase activity; metalloendopeptidase activity; serine-type endopeptidase activity; calcium ion binding; collagen binding; extracellular region; proteinaceous extracellular matrix; extracellular space; nucleus; cytoplasm; proteolysis; protein import into nucleus; zinc ion binding; extracellular matrix disasse…	BP; MF; CC	Any process that stops, prevents, or reduces the frequency, rate or extent of transcription mediated by RNA polymerase II.; Interacting selectively and non-covalently with the regulatory region composed of the transcription start site and binding sites for the basal transcription machinery. Binding may occur as a sequence specific interaction or as an interaction observed only once a factor has b…
PTGS2	prostaglandin-endoperoxide synthase 2	00590; 01100; 04370; 05140; 05200; 05222	Arachidonic acid metabolism; Metabolic pathways; VEGF signaling pathway; Leishmaniasis; Pathways in cancer; Small cell lung cancer	GO:0001516; GO:0001525; GO:0004601; GO:0004666; GO:0005515; GO:0005737; GO:0005783; GO:0005788; GO:0005789; GO:0005901; GO:0006954; GO:0006979; GO:0007566; GO:0007568; GO:0007612; GO:0007613; GO:0008217; GO:0008285; GO:0009750; GO:0010042; GO:0010226; GO:0010575; GO:0019221; GO:0019233; GO:0019371; GO:0019372; GO:0019899; GO:0020037; GO:0030282; GO:0030728; GO:0031090; GO:0031394; GO:0031622; GO:…	prostaglandin biosynthetic process; angiogenesis; peroxidase activity; prostaglandin-endoperoxide synthase activity; protein binding; cytoplasm; endoplasmic reticulum; endoplasmic reticulum lumen; endoplasmic reticulum membrane; caveola; inflammatory response; response to oxidative stress; embryo implantation; aging; learning; memory; regulation of blood pressure; negative regulation of cell prol…	BP; MF; CC	The chemical reactions and pathways resulting in the formation of prostaglandins, any of a group of biologically active metabolites which contain a cyclopentane ring.; Blood vessel formation when new vessels emerge from the proliferation of pre-existing blood vessels.; Catalysis of the reaction: donor + hydrogen peroxide = oxidized donor + 2 H2O.; Catalysis of the reaction: arachidonate + donor-H…
SERPINB2	serpin family B member 2	5146	Amoebiasis	GO:0004867; GO:0005576; GO:0005615; GO:0005737; GO:0005886; GO:0010951; GO:0035722; GO:0042060; GO:0042730; GO:0043066	serine-type endopeptidase inhibitor activity; extracellular region; extracellular space; cytoplasm; plasma membrane; negative regulation of endopeptidase activity; interleukin-12-mediated signaling pathway; wound healing; fibrinolysis; negative regulation of apoptotic process	MF; CC; BP	Stops, prevents or reduces the activity of serine-type endopeptidases, enzymes that catalyze the hydrolysis of nonterminal peptide bonds in a polypeptide chain; a serine residue (and a histidine residue) are at the active center of the enzyme.; The space external to the outermost structure of a cell. For cells without external protective or external encapsulating structures this refers to space o…
SOD2	superoxide dismutase 2	04146; 05016	Peroxisome; Huntington's disease	GO:0000303; GO:0001315; GO:0001836; GO:0003069; GO:0004784; GO:0005739; GO:0005743; GO:0005759; GO:0006357; GO:0006801; GO:0007005; GO:0007568; GO:0008217; GO:0008285; GO:0019430; GO:0030145; GO:0030335; GO:0032364; GO:0034599; GO:0035722; GO:0042802; GO:0043524; GO:0046872; GO:0051289; GO:0055114; GO:0070062; GO:1902176	response to superoxide; age-dependent response to reactive oxygen species; release of cytochrome c from mitochondria; acetylcholine-mediated vasodilation involved in regulation of systemic arterial blood pressure; superoxide dismutase activity; mitochondrion; mitochondrial inner membrane; mitochondrial matrix; regulation of transcription by RNA polymerase II; superoxide metabolic process; mitocho…	BP; MF; CC	Any process that results in a change in state or activity of a cell or an organism (in terms of movement, secretion, enzyme production, gene expression, etc.) as a result of a superoxide stimulus. Superoxide is the anion, oxygen-, formed by addition of one electron to dioxygen (O2) or any compound containing the superoxide anion.; Any process that results in a change in state or activity of a cel…
TNFAIP3	TNF alpha induced protein 3	4621	NOD-like receptor signaling pathway	GO:0001922; GO:0002020; GO:0002237; GO:0002634; GO:0002677; GO:0003677; GO:0004842; GO:0004843; GO:0005515; GO:0005634; GO:0005737; GO:0005764; GO:0005829; GO:0006915; GO:0006954; GO:0006955; GO:0008270; GO:0010803; GO:0016579; GO:0019900; GO:0031397; GO:0032088; GO:0032480; GO:0032495; GO:0032691; GO:0032703; GO:0032715; GO:0032720; GO:0034136; GO:0034140; GO:0034144; GO:0034148; GO:0035871; GO:…	B-1 B cell homeostasis; protease binding; response to molecule of bacterial origin; regulation of germinal center formation; negative regulation of chronic inflammatory response; DNA binding; ubiquitin-protein transferase activity; thiol-dependent ubiquitin-specific protease activity; protein binding; nucleus; cytoplasm; lysosome; cytosol; apoptotic process; inflammatory response; immune response…	BP; MF; CC	The process of regulating the proliferation and elimination of B cells of the B-1 subset such that the total number of B-1 B cells within a whole or part of an organism is stable over time in the absence of an outside stimulus. B-1 B cells are a distinct subset of B cells characterized as being CD5 positive, found predominantly in the peritoneum, pleural cavities, and spleen, and enriched for sel…
